# Supplementary material
Source: publisher site journal article supplement (https://static.cambridge.org/content/id/urn:cambridge.org:id:article:S0025315413000052/resource/name/S0025315413000052supp01.doc)
Supplement: Supplementary file 1 [file S0025315413000052supp01.doc]

**Supplementary Table 1.** Standing stocks (ind m-2) of Thecosomata taxa.

| Time | Sep 10 | Sep 10 | Sep 10 | Sep 10 | Sep 10 | Sep 10 | Sep 10 | Feb 11 | Feb 11 | Feb 11 | Feb 11 | Feb 11 | Feb 11 | Feb 11 | Feb 11 | Jan 11 | Jan 11 |
| --- | --- | --- | --- | --- | --- | --- | --- | --- | --- | --- | --- | --- | --- | --- | --- | --- | --- |
| Site | OC-Day | OC-Night | SB-Day | SB-Night | OS-Day | OS-Night | IS-Night | OC-Day | OC-Night | LS-Day | LS-Night | SL-Day | SL-Night | SB-Day | OS-Night | IS-Day | IS-Night |
| Sampled depth range (m) | 0-1000 | 0-1000 | 0-350 | 0-350 | 0-150 | 0-150 | 0-100 | 0-1000 | 0-1000 | 0-1000 | 0-1000 | 0-800 | 0-800 | 0-300 | 0-140 | 0-100 | 0-100 |
| juvenile *Cavolinia* spp. | 0.42 | 0.74 | 0.28 | 0.00 | 0.00 | 0.00 | 0.00 | 7.20 | 5.45 | 53.92 | 40.61 | 153.10 | 175.10 | 1.72 | 0.33 | 0.00 | 0.00 |
| *Cavolinia inflex*a | 1.87 | 3.34 | 0.28 | 0.00 | 0.00 | 0.00 | 0.00 | 2.55 | 2.99 | 6.11 | 1.06 | 12.21 | 16.02 | 1.29 | 0.00 | 0.00 | 0.00 |
| juv. *Clio* spp. | 10.55 | 45.27 | 0.27 | 0.00 | 0.27 | 0.00 | 0.00 | 8.09 | 0.00 | 28.01 | 25.75 | 55.36 | 19.32 | 0.00 | 0.57 | 0.00 | 0.00 |
| *Clio pyramidiata* | 1.82 | 24.23 | 1.16 | 0.00 | 0.00 | 1.49 | 0.00 | 2.30 | 3.72 | 7.43 | 6.42 | 35.62 | 23.59 | 0.59 | 0.00 | 0.00 | 0.00 |
| *Clio recurva* | 0.00 | 0.41 | 0.00 | 0.00 | 0.00 | 0.00 | 0.00 | 0.00 | 0.00 | 0.00 | 0.24 | 0.00 | 0.53 | 0.00 | 0.00 | 0.00 | 0.00 |
| *Creseis acicula* | 0.00 | 0.00 | 0.00 | 0.00 | 0.00 | 0.00 | 0.00 | 0.29 | 0.76 | 0.00 | 0.00 | 0.00 | 0.00 | 0.00 | 0.00 | 0.00 | 0.00 |
| *Creseis virgula* | 0.00 | 0.00 | 0.00 | 0.00 | 0.00 | 0.00 | 0.00 | 0.00 | 0.00 | 0.00 | 0.00 | 0.27 | 0.00 | 0.00 | 0.00 | 0.00 | 0.00 |
| *Cuvierina columnella* | 0.00 | 0.11 | 0.00 | 0.00 | 0.00 | 0.00 | 0.00 | 0.00 | 0.47 | 0.00 | 0.00 | 0.00 | 0.00 | 0.00 | 0.00 | 0.00 | 0.00 |
| *Diacria danae* | 0.00 | 0.00 | 0.00 | 0.00 | 0.00 | 0.00 | 0.00 | 0.25 | 0.00 | 0.00 | 0.00 | 0.00 | 0.00 | 0.00 | 0.00 | 0.00 | 0.00 |
| *Diacria rampali* | 0.00 | 0.22 | 0.00 | 0.00 | 0.00 | 0.00 | 0.00 | 0.26 | 0.18 | 0.25 | 0.00 | 0.00 | 0.34 | 0.00 | 0.00 | 0.00 | 0.00 |
| *Diacria trispinosa* | 0.00 | 1.24 | 0.00 | 0.00 | 0.00 | 0.30 | 0.00 | 0.00 | 1.18 | 1.02 | 0.42 | 0.26 | 0.68 | 0.59 | 0.00 | 0.00 | 0.00 |
| *Diacria* sp. | 0.25 | 0.22 | 0.00 | 0.00 | 0.00 | 0.00 | 0.00 | 0.00 | 0.00 | 0.00 | 0.00 | 0.00 | 0.00 | 0.00 | 0.00 | 0.00 | 0.00 |
| *Hyalocylis striata* | 0.00 | 1.68 | 0.00 | 0.00 | 0.00 | 0.00 | 0.00 | 18.81 | 9.49 | 3.21 | 4.27 | 5.08 | 6.16 | 0.00 | 0.00 | 0.00 | 0.00 |
| *Styliola subula* | 0.00 | 0.32 | 0.00 | 0.00 | 0.00 | 0.00 | 0.00 | 1.01 | 2.01 | 1.28 | 0.26 | 0.63 | 4.04 | 0.00 | 0.00 | 0.00 | 0.00 |
| *Limacina bulimoides* | 0.00 | 4.87 | 0.28 | 0.00 | 0.00 | 1.11 | 0.00 | 108.11 | 140.91 | 1209.13 | 627.92 | 627.33 | 624.52 | 5.27 | 1.16 | 0.00 | 0.00 |
| *Limacina helicoides* | 0.00 | 0.41 | 0.00 | 0.00 | 0.00 | 0.00 | 0.00 | 0.00 | 0.00 | 0.00 | 0.00 | 0.67 | 0.00 | 0.36 | 0.00 | 0.00 | 0.00 |
| *Limacina inflata* | 67.70 | 201.04 | 6.24 | 1.63 | 1.42 | 5.75 | 0.00 | 42.92 | 13.90 | 110.17 | 123.45 | 364.87 | 452.71 | 26.25 | 1.62 | 3.59 | 7.15 |
| *Limacina lesueuri* | 0.00 | 0.20 | 0.00 | 0.00 | 0.00 | 0.00 | 0.00 | 0.25 | 0.18 | 0.76 | 0.66 | 0.27 | 0.00 | 0.00 | 0.00 | 0.00 | 0.00 |
| *Cymbulia parvidentata* | 0.00 | 0.00 | 0.34 | 0.00 | 0.00 | 0.00 | 0.00 | 0.00 | 0.00 | 0.25 | 0.00 | 0.00 | 0.55 | 0.28 | 0.00 | 0.00 | 0.00 |
| *Cymbulia sibogae* | 0.00 | 0.00 | 0.00 | 0.00 | 0.00 | 0.00 | 0.00 | 0.00 | 0.00 | 0.00 | 0.28 | 0.27 | 0.00 | 0.00 | 0.33 | 0.00 | 0.00 |
| *Cymbulia* sp. | 0.00 | 0.00 | 0.62 | 0.59 | 0.00 | 0.00 | 0.00 | 0.00 | 0.00 | 0.00 | 0.00 | 0.00 | 0.00 | 0.00 | 0.00 | 0.00 | 0.00 |
| *Desmopterus papilio* | 138.69 | 25.07 | 6.52 | 0.00 | 0.00 | 0.61 | 0.00 | 152.36 | 135.03 | 61.88 | 68.17 | 84.44 | 84.56 | 58.86 | 12.14 | 0.00 | 1.92 |
| *Peraclis apicifulva* | 0.29 | 0.00 | 0.00 | 0.00 | 0.00 | 0.00 | 0.00 | 3.14 | 9.89 | 3.40 | 0.50 | 3.35 | 0.89 | 0.00 | 0.27 | 0.00 | 0.00 |
| *Peraclis reticulata* | 0.00 | 0.00 | 0.00 | 0.00 | 0.00 | 0.00 | 0.00 | 1.08 | 0.25 | 0.76 | 0.54 | 1.90 | 1.57 | 0.29 | 0.00 | 0.00 | 0.00 |
| div. Thecosomata | 0.00 | 0.40 | 0.00 | 0.00 | 0.00 | 0.54 | 0.00 | 0.00 | 0.00 | 0.00 | 0.00 | 0.00 | 0.00 | 0.00 | 0.00 | 0.00 | 0.00 |
| Total | 221.59 | 309.75 | 15.98 | 2.22 | 1.69 | 9.81 | 0.00 | 348.62 | 326.40 | 1487.58 | 900.55 | 1345.64 | 1410.58 | 95.50 | 16.44 | 3.59 | 9.08 |

OC = oceanic, LS = lower slope, SL = slope, SB = shelf break, OS = outer shelf, IS = inner shelf

**Supplementary Table 2.** Weighted mean depths (WMD) of Thecosomata taxa off Walvis Bay.

| Time | Sep 10 | Sep 10 | Sep 10 | Sep 10 | Sep 10 | Sep 10 | Sep 10 | Feb 11 | Feb 11 | Feb 11 | Feb 11 | Feb 11 | Feb 11 | Feb 11 | Feb 11 | Jan 11 | Jan 11 |
| --- | --- | --- | --- | --- | --- | --- | --- | --- | --- | --- | --- | --- | --- | --- | --- | --- | --- |
| Site | OC-Day | OC-Night | SB-Day | SB-Night | OS-Day | OS-Night | IS-Night | OC-Day | OC-Night | LS-Day | LS-Night | SL-Day | SL-Night | SB-Day | OS-Night | IS-Day | IS-Night |
| Sampled depth range (m) | 0-1000 | 0-1000 | 0-350 | 0-350 | 0-150 | 0-150 | 0-100 | 0-1000 | 0-1000 | 0-1000 | 0-1000 | 0-800 | 0-800 | 0-300 | 0-140 | 0-100 | 0-100 |
| juvenile *Cavolinia* spp. | 37.5 | 19.2 | 75.0 | - | - | - | - | 69.4 | 46.4 | 85.9 | 30.1 | 145.2 | 13.3 | 28.3 | 37.5 | - | - |
| *Cavolinia inflex*a | 75.0 | 14.0 | 75.0 | - | - | - | - | 146.2 | 40.5 | 316.6 | 60.7 | 286.9 | 15.2 | 48.0 | - | - | - |
| juv. *Clio* spp. | 104.7 | 25.3 | 175.0 | - | 75.0 | - | - | 174.8 | - | 88.3 | 44.3 | 164.4 | 20.6 | - | 27.0 | - | - |
| *Clio pyramidiata* | 378.0 | 24.8 | 204.6 | - | - | 41.7 | - | 300.0 | 51.1 | 210.4 | 18.2 | 304.0 | 18.4 | 150.0 | - | - | - |
| *Clio recurva* | - | 61.0 | - | - | - | - | - | - | - | - | 300.0 | - | 49.6 | - | - | - | - |
| *Creseis acicula* | - |  | - | - | - | - | - | 37.5 | 31.6 | - | - | - | - | - | - | - | - |
| *Creseis virgula* | - |  | - | - | - | - | - | - | - | - | - | 150.0 | - | - | - | - | - |
| *Cuvierina columnella* | - | 12.5 | - | - | - | - | - | - | 28.0 | - | - | - | - | - | - | - | - |
| *Diacria danae* | - |  | - | - | - | - | - | 150.0 | - | - | - | - | - | - | - | - | - |
| *Diacria rampali* | - | 12.5 | - | - | - | - | - | 300.0 | 12.5 | 300.0 | - | - | 12.5 | - | - | - | - |
| *Diacria trispinosa* | - | 24.5 | - | - | - | 37.5 | - | - | 18.6 | 240.3 | 12.5 | 75.0 | 12.5 | 150.0 | - | - | - |
| *Diacria* sp. | 150.0 | 12.5 | - | - | - | - | - | - | - | - | - | - | - | - | - | - | - |
| *Hyalocylis striata* | - | 21.4 | - | - | - | - | - | 63.3 | 24.9 | 53.2 | 14.1 | 110.4 | 12.5 | - | - | - | - |
| *Styliola subula* | - | 12.5 | - | - | - | - | - | 200.4 | 19.7 | 187.1 | 75.0 | 367.6 | 14.2 | - | - | - | - |
| *Limacina bulimoides* | - | 18.6 | 75.0 | - | - | 19.2 | - | 104.1 | 38.9 | 46.7 | 23.3 | 60.1 | 15.3 | 38.4 | 55.3 | - | - |
| *Limacina helicoides* | - | 61.0 | - | - | - | - | - | - | - | - | - | 37.5 | - | 37.5 | - | - | - |
| *Limacina inflata* | 97.8 | 22.0 | 111.6 | 68.3 | 74.1 | 17.0 | - | 178.0 | 49.7 | 89.6 | 20.8 | 184.2 | 16.6 | 42.5 | 40.1 | 75.0 | 13.8 |
| *Limacina lesueuri* | - | 37.5 | - | - | - | - | - | 150.0 | 12.5 | 150.0 | 31.8 | 150.0 | - | - | - | - | - |
| *Cymbulia parvidentata* | - |  | 125.0 | - | - | - | - | - | - | 500.0 | - | - | 60.2 | 75.0 | - | - | - |
| *Cymbulia sibogae* | - |  | - | - | - | - | - | - | - | - | 37.5 | 150.0 | - | - | 37.5 | - | - |
| *Cymbulia* sp. | - |  | 186.0 | 103.1 | - | - | - | - | - | - | - | - | - | - | - | - | - |
| *Desmopterus papilio* | 150.6 | 107.0 | 173.4 | - | - | 25.3 | - | 47.6 | 87.9 | 79.9 | 88.3 | 108.3 | 105.0 | 49.9 | 87.9 | - | 69.5 |
| *Peraclis apicifulva* | 700.0 |  | - | - | - | - | - | 213.2 | 58.5 | 85.4 | 197.8 | 80.3 | 27.8 | - | 75.0 | - | - |
| *Peraclis reticulata* | - |  | - | - | - | - | - | 219.7 | 75.0 | 150.0 | 49.2 | 63.8 | 21.1 | 150.0 | - | - | - |
| div. Thecosomata | - | 37.5 | - | - | - | 12.5 | - | - | - | - | - | - | - | - | - | - | - |
| Total | 125.3 | 25.2 | 146.0 | 77.1 | 74.2 | 21.2 | - | 70.5 | 52.5 | 51.2 | 26.2 | 90.3 | 17.6 | 46.9 | 71.9 | 75.0 | 25.6 |

OC = oceanic, LS = lower slope, SL = slope, SB = shelf break, OS = outer shelf, IS = inner shelf
